# Supplementary material
Source: PubMed Central journal article supplement (PMC6990708)
Supplement: jamaophthalmol-138-156-s001.pdf [file jamaophthalmol-138-156-s001.pdf]

## Supplementary Online Content

Vail D, Pan C, Pershing S, Mruthyunjaya P. Association of rhegmatogenous retinal detachment and outcomes with the day of the week that patients undergo a repair or receive a diagnosis. *JAMA Ophthalmol*. Published online December 19, 2019. doi:10.1001/jamaophthalmol.2019.5253

**eFigure.** Sample Selection Strategy

**eTable 1.** Diagnostic (*ICD*) and Procedure (*CPT*) Codes

**eTable 2.** Multinomial Logistic Regression Model of Type of Rhegmatogenous Retinal Detachment Repair by Day of Diagnosis (N=36,831)

**eTable 3.** Logistic Regression Models Estimating 30-Day Revision of Initial Scleral Buckle (Defined as Subsequent PR, SB, or PPV Within 30 Days of the Index Procedure), by Day of Week of the Index Procedure (N=3,590)

**eTable 4.** Logistic Regression Models Estimating 30-Day Revision of Initial Pars Plana Vitrectomy (Defined as Subsequent PR, SB, or PPV Within 30 Days of the Index Procedure), by Day of Week of the Index Procedure (N=21,120)

**eTable 5.** Days From Index Diagnosis of Rhegmatogenous Retinal Detachment to Repair by Day of Diagnosis (N=36,831)

This supplementary material has been provided by the authors to give readers additional information about their work.

**eFigure.** Sample Selection Strategy

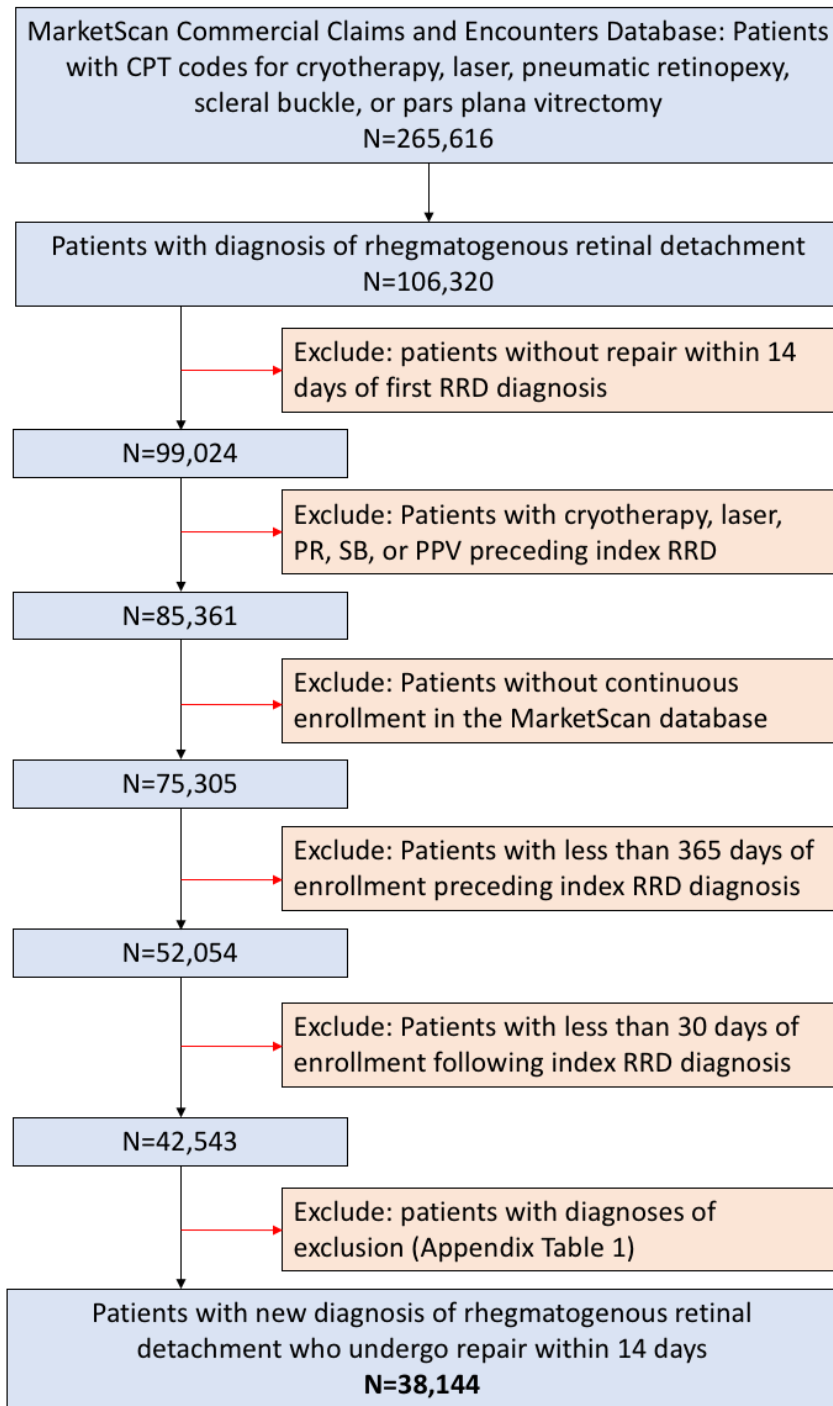

**eTable 1.** Diagnostic (*ICD*) and Procedure (*CPT*) Codes

| <b>Diagnosis</b>                               | <b>ICD-9 Code</b>                             | <b>ICD-10 Code</b>                                                                     |
|------------------------------------------------|-----------------------------------------------|----------------------------------------------------------------------------------------|
| Rhegmatogenous retinal detachment              | 361.00, 361.01, 361.02, 61.03, 361.04, 361.05 | H33.00x, H33.01x, H33.02x, H33.03x, H33.04x, H33.05x                                   |
| Myopia                                         | 360.21                                        | H44.2x                                                                                 |
| Pseudophakia                                   | V43.1                                         | Z96.1, Z98.4x                                                                          |
| Vitreous hemorrhage                            | 379.23                                        | H43.1x                                                                                 |
| Lattice degeneration                           | 362.63                                        | H35.41x                                                                                |
| Diabetes mellitus                              | 250.x, 362.0x, (except 362.02)                | E08.x, E09.x, E10.x, E11.x, E13.x (except E08.35x, E09.35x, E10.35x, E11.35x, E13.35x) |
| <b>Excluded ocular comorbidities:</b>          |                                               |                                                                                        |
| Tractional retinal detachment                  | 36181                                         | H33.4x                                                                                 |
| Proliferative diabetic retinopathy             | 36202                                         | E08.3x                                                                                 |
| Retinopathy of prematurity                     | 362.2x                                        | H35.1x                                                                                 |
| Sickle cell disease or sickle cell thalassemia | 28241                                         | D57x                                                                                   |
|                                                | 28242                                         |                                                                                        |
|                                                | 282.6x                                        |                                                                                        |
| Retinoschisis                                  | 361.1x                                        | H33.1x                                                                                 |
| Chorioretinitis                                | 363.1x                                        | H30.x                                                                                  |
|                                                | 363.2x                                        |                                                                                        |
| Endophthalmitis                                | 360.0x                                        | H44.0x                                                                                 |
|                                                | 360.1x                                        | H44.1x                                                                                 |
| Ruptured globe/intraocular foreign body        |                                               |                                                                                        |
|                                                | 8710                                          | S05.2x                                                                                 |
|                                                | 8711                                          | S05.3x                                                                                 |
|                                                | 8712                                          | S05.5x                                                                                 |
|                                                | 8715                                          | S05.6x                                                                                 |
|                                                | 8716                                          | H44.6x                                                                                 |
|                                                | 360.5x                                        | H44.7x                                                                                 |
|                                                | 360.6x                                        |                                                                                        |
| Retinal vascular occlusion                     | 362.3x                                        | H34.x                                                                                  |
| Serous retinal detachment                      | 3612                                          | H33.2x                                                                                 |
| Choroidal hemorrhage or rupture                | 3636                                          |                                                                                        |
|                                                | 36372                                         | H31.3x                                                                                 |
|                                                |                                               | H31.4x                                                                                 |
| <b>Procedure</b>                               | <b>CPT code</b>                               |                                                                                        |
| Pneumatic retinopexy                           | 67110                                         |                                                                                        |
| Scleral buckle                                 | 67107                                         |                                                                                        |

|                                                       |                                                                                |  |
|-------------------------------------------------------|--------------------------------------------------------------------------------|--|
| Pars plana vitrectomy, with or without scleral buckle | 67108, 67112, 67113, 67036, 67038, 67039, 67040, 67041, 67042, 67043, or 66850 |  |
| Laser barricade                                       | 67105                                                                          |  |
| Cryotherapy                                           | 67101                                                                          |  |

**eTable 2.** Multinomial Logistic Regression Model of Type of Rhegmatogenous Retinal Detachment Repair by Day of Diagnosis (N=36,831)

|                                          | Repair procedure: Multinomial logistic regression with pars plana vitrectomy as reference group |         |                   |         |                      |         |                   |         |
|------------------------------------------|-------------------------------------------------------------------------------------------------|---------|-------------------|---------|----------------------|---------|-------------------|---------|
|                                          | Cryotherapy                                                                                     |         | Laser             |         | Pneumatic retinopexy |         | Scleral buckle    |         |
|                                          | RRR (95% CI)                                                                                    | P Value | RRR (95% CI)      | P Value | RRR (95% CI)         | P Value | RRR (95% CI)      | P Value |
| <b>Day of diagnosis (base=Wednesday)</b> |                                                                                                 |         |                   |         |                      |         |                   |         |
| Sunday                                   | 0.70 (0.29, 1.68)                                                                               | .42     | 0.42 (0.28, 0.62) | <.001   | 1.53 (1.08, 2.17)    | .02     | 1.02 (0.75, 1.37) | .92     |
| Monday                                   | 1.05 (0.77, 1.44)                                                                               | .75     | 0.85 (0.74, 0.97) | .02     | 1.16 (1.00, 1.35)    | .045    | 1.01 (0.90, 1.13) | .89     |
| Tuesday                                  | 1.20 (0.88, 1.64)                                                                               | .25     | 0.92 (0.80, 1.06) | .25     | 1.09 (0.94, 1.27)    | .24     | 1.05 (0.93, 1.18) | .43     |
| Thursday                                 | 1.05 (0.75, 1.46)                                                                               | .78     | 0.96 (0.83, 1.11) | .59     | 1.19 (1.02, 1.39)    | .03     | 1.07 (0.94, 1.21) | .30     |
| Friday                                   | 1.39 (1.02, 1.91)                                                                               | .04     | 1.02 (0.88, 1.18) | .76     | 1.37 (1.17, 1.60)    | <.001   | 1.05 (0.92, 1.19) | .49     |
| Saturday                                 | 0.68 (0.36, 1.28)                                                                               | .23     | 0.78 (0.61, 0.99) | .04     | 1.73 (1.36, 2.20)    | <.001   | 1.39 (1.15, 1.68) | .001    |
| <b>Year of surgery</b>                   | 0.93 (0.90, 0.97)                                                                               | .001    | 0.99 (0.98, 1.01) | .52     | 0.97 (0.95, 0.99)    | .001    | 0.90 (0.88, 0.91) | <.001   |
| <b>Age at surgery (years)</b>            | 0.99 (0.98, 1.00)                                                                               | .04     | 0.98 (0.98, 0.98) | <.001   | 1.00 (1.00, 1.00)    | .95     | 0.96 (0.95, 0.96) | <.001   |
| <b>Sex (base=Male)</b>                   |                                                                                                 |         |                   |         |                      |         |                   |         |
| Female                                   | 1.37 (1.13, 1.66)                                                                               | .001    | 1.62 (1.48, 1.77) | <.001   | 1.03 (0.94, 1.13)    | .52     | 1.18 (1.09, 1.27) | <.001   |
| <b>Ocular comorbidities</b>              |                                                                                                 |         |                   |         |                      |         |                   |         |
| Myopia                                   | 0.64 (0.25, 1.61)                                                                               | .34     | 1.14 (0.83, 1.58) | .42     | 1.32 (0.93, 1.86)    | .12     | 1.23 (0.96, 1.58) | .10     |
| Pseudophakia                             | 0.40 (0.05, 3.02)                                                                               | .38     | 0.35 (0.17, 0.69) | .003    | 1.14 (0.67, 1.96)    | .62     | 0.14 (0.05, 0.45) | .001    |
| Lattice degeneration                     | 0.70 (0.50, 0.98)                                                                               | .04     | 0.95 (0.83, 1.09) | .48     | 0.64 (0.55, 0.75)    | <.001   | 1.28 (1.15, 1.42) | <.001   |
| Vitreous hemorrhage                      | 1.53 (1.15, 2.04)                                                                               | .004    | 1.15 (0.99, 1.34) | .06     | 0.44 (0.37, 0.53)    | <.001   | 0.24 (0.19, 0.31) | <.001   |
| <b>Insurance plan (base=PPO)</b>         |                                                                                                 |         |                   |         |                      |         |                   |         |

|                                       |                   |       |                   |       |                   |       |                   |       |
|---------------------------------------|-------------------|-------|-------------------|-------|-------------------|-------|-------------------|-------|
| EPO                                   | 1.00 (0.69, 1.44) | .99   | 0.90 (0.76, 1.07) | .25   | 0.94 (0.79, 1.12) | .49   | 1.26 (1.08, 1.46) | .003  |
| HMO                                   | 1.06 (0.53, 2.10) | .87   | 1.16 (0.84, 1.61) | .37   | 0.93 (0.66, 1.32) | .70   | 0.98 (0.73, 1.31) | .89   |
| POS                                   | 0.97 (0.69, 1.36) | .87   | 0.99 (0.85, 1.15) | .86   | 1.15 (0.99, 1.34) | .08   | 1.15 (1.02, 1.30) | .02   |
| Comprehensive                         | 1.02 (0.69, 1.52) | .91   | 1.23 (1.03, 1.46) | .02   | 1.03 (0.85, 1.24) | .77   | 0.96 (0.82, 1.11) | .58   |
| POS with capitation                   | 0.92 (0.31, 2.70) | .87   | 0.74 (0.43, 1.26) | .26   | 0.87 (0.50, 1.51) | .62   | 1.24 (0.78, 1.96) | .37   |
| CDHP                                  | 1.06 (0.69, 1.64) | .78   | 1 (0.83, 1.21)    | .98   | 1.15 (0.94, 1.40) | .18   | 1.26 (1.08, 1.47) | .004  |
| HDHP                                  | 1.16 (0.70, 1.91) | .57   | 0.92 (0.73, 1.16) | .46   | 1.32 (1.04, 1.67) | .02   | 1.16 (0.96, 1.40) | .13   |
| <b>Place of surgery (base=Office)</b> |                   |       |                   |       |                   |       |                   |       |
| Inpatient hospital                    | n/a               | n/a   | 0.01 (0.00, 0.03) | <.001 | 0.02 (0.01, 0.05) | <.001 | 1.03 (0.64, 1.66) | .91   |
| Outpatient hospital                   | 0.01 (0.01, 0.01) | <.001 | 0.00 (0.00, 0.01) | <.001 | 0.01 (0.01, 0.01) | <.001 | 0.79 (0.69, 0.90) | .001  |
| Emergency room                        | 0.04 (0.01, 0.26) | .001  | 0.03 (0.02, 0.06) | <.001 | 0.02 (0.01, 0.05) | <.001 | 1.32 (0.82, 2.13) | .25   |
| Ambulatory surgical center            | 0.01 (0.00, 0.02) | <.001 | 0.01 (0.01, 0.02) | <.001 | 0.01 (0.01, 0.01) | <.001 | 0.54 (0.46, 0.64) | <.001 |
| Other                                 | 0.03 (0.00, 0.21) | <.001 | 0.03 (0.02, 0.05) | <.001 | 0.04 (0.02, 0.06) | <.001 | 0.29 (0.13, 0.63) | .002  |

Note: RRR=Relative Risk Ratio

**eTable 3.** Logistic Regression Models Estimating 30-Day Revision of Initial Scleral Buckle (Defined as Subsequent PR, SB, or PPV Within 30 Days of the Index Procedure), by Day of Week of the Index Procedure (N=3,590)

|                                                     | <b>RRR (95% CI)</b> | <b>P Value</b> |
|-----------------------------------------------------|---------------------|----------------|
| <b>Day of index scleral buckle (base=Wednesday)</b> |                     |                |
| Sunday                                              | 0.88 (0.30, 2.60)   | .82            |
| Monday                                              | 1.31 (0.93, 1.84)   | .12            |
| Tuesday                                             | 0.87 (0.62, 1.21)   | .40            |
| Thursday                                            | 0.88 (0.63, 1.23)   | .45            |
| Friday                                              | 1.06 (0.76, 1.50)   | .72            |
| Saturday                                            | 1.10 (0.69, 1.76)   | .68            |
| <b>Year of surgery</b>                              | 0.94 (0.90, 0.99)   | .02            |
| <b>Age at surgery (years)</b>                       | 1.00 (0.99, 1.01)   | .83            |
| <b>Sex (base=Male)</b>                              |                     |                |
| Female                                              | 0.98 (0.79, 1.21)   | .85            |
| <b>Ocular comorbidities</b>                         |                     |                |
| Myopia                                              | 1.75 (1.00, 3.08)   | .05            |
| Pseudophakia                                        | n/a                 | n/a            |
| Lattice degeneration                                | 1.08 (0.80, 1.44)   | .62            |
| Vitreous hemorrhage                                 | 1.93 (1.08, 3.46)   | .03            |
| <b>Insurance plan (base=PPO)</b>                    |                     |                |
| EPO                                                 | 0.90 (0.57, 1.42)   | .64            |
| HMO                                                 | 1.51 (0.76, 2.99)   | .24            |
| POS                                                 | 1.04 (0.75, 1.44)   | .83            |
| Comprehensive                                       | 1.06 (0.70, 1.60)   | .80            |
| POS with capitation                                 | n/a                 | n/a            |
| CDHP                                                | 1.28 (0.84, 1.93)   | .25            |
| HDHP                                                | 0.86 (0.48, 1.56)   | .63            |
| <b>Place of surgery</b>                             |                     |                |
| Inpatient hospital                                  | 0.96 (0.36, 2.53)   | .93            |
| Outpatient hospital                                 | 0.36 (0.27, 0.49)   | <.001          |
| Emergency room                                      | 0.33 (0.10, 1.15)   | .08            |
| Ambulatory surgical center                          | 0.31 (0.20, 0.47)   | <.001          |

**eTable 4.** Logistic Regression Models Estimating 30-Day Revision of Initial Pars Plana Vitrectomy (Defined as Subsequent PR, SB, or PPV Within 30 Days of the Index Procedure), by Day of Week of the Index Procedure (N=21,120)

|                                                            | <b>RRR (95% CI)</b> | <b>P Value</b> |
|------------------------------------------------------------|---------------------|----------------|
| <b>Day of index pars plana vitrectomy (base=Wednesday)</b> |                     |                |
| Sunday                                                     | 0.95 (0.59, 1.53)   | .84            |
| Monday                                                     | 1.12 (0.95, 1.33)   | .19            |
| Tuesday                                                    | 1.02 (0.87, 1.19)   | .83            |
| Thursday                                                   | 0.98 (0.84, 1.14)   | .77            |
| Friday                                                     | 1.06 (0.90, 1.25)   | .50            |
| Saturday                                                   | 0.91 (0.68, 1.21)   | .51            |
| <b>Year of surgery</b>                                     | 0.99 (0.97, 1.02)   | .61            |
| <b>Age at surgery (years)</b>                              | 1.00 (0.99, 1.00)   | .02            |
| <b>Sex (base=Male)</b>                                     |                     |                |
| Female                                                     | 1.00 (0.90, 1.11)   | .97            |
| <b>Ocular comorbidities</b>                                |                     |                |
| Myopia                                                     | 0.88 (0.58, 1.35)   | .56            |
| Pseudophakia                                               | 1.18 (0.74, 1.87)   | .48            |
| Lattice degeneration                                       | 0.98 (0.83, 1.16)   | .82            |
| Vitreous hemorrhage                                        | 1.06 (0.89, 1.27)   | .50            |
| <b>Insurance plan (base=PPO)</b>                           |                     |                |
| EPO                                                        | 1.05 (0.88, 1.26)   | .56            |
| HMO                                                        | 1.15 (0.78, 1.70)   | .48            |
| POS                                                        | 0.91 (0.76, 1.09)   | .32            |
| Comprehensive                                              | 0.88 (0.70, 1.09)   | .23            |
| POS with capitation                                        | 1.54 (0.87, 2.72)   | .14            |
| CDHP                                                       | 0.85 (0.66, 1.09)   | .19            |
| HDHP                                                       | 1.01 (0.77, 1.34)   | .92            |
| <b>Place of surgery</b>                                    |                     |                |
| Inpatient hospital                                         | 0.67 (0.36, 1.24)   | .20            |
| Outpatient hospital                                        | 0.44 (0.37, 0.51)   | <.001          |
| Emergency room                                             | 0.14 (0.03, 0.59)   | .007           |
| Ambulatory surgical center                                 | 0.31 (0.26, 0.38)   | <.001          |
| Other                                                      | 0.16 (0.05, 0.52)   | .002           |



**eTable 5.** Days From Index Diagnosis of Rhegmatogenous Retinal Detachment to Repair by Day of Diagnosis (N=36,831)

|                                          | All types of primary repair (N=36,831) |         | Pneumatic retinopexy (N=5,018) |         | Pars plana vitrectomy (N=21,120) |         | Scleral buckle (N=3,624) |         |
|------------------------------------------|----------------------------------------|---------|--------------------------------|---------|----------------------------------|---------|--------------------------|---------|
|                                          | Beta (95% CI)                          | P Value | Beta (95% CI)                  | P Value | Beta (95% CI)                    | P Value | Beta (95% CI)            | P Value |
| <b>Day of diagnosis (base=Wednesday)</b> |                                        |         |                                |         |                                  |         |                          |         |
| Sunday                                   | -0.37 (-0.57, -0.17)                   | <.001   | -0.13 (-0.30, 0.05)            | .16     | -0.38 (-0.66, -0.11)             | .007    | -0.54 (-1.24, 0.17)      | .13     |
| Monday                                   | -0.05 (-0.13, 0.02)                    | .16     | -0.08 (-0.16, 0.01)            | .08     | -0.02 (-0.12, 0.09)              | .75     | -0.09 (-0.36, 0.18)      | .52     |
| Tuesday                                  | -0.10 (-0.18, -0.02)                   | .01     | -0.01 (-0.10, 0.07)            | .75     | -0.16 (-0.27, -0.05)             | .003    | -0.06 (-0.34, 0.22)      | .67     |
| Thursday                                 | 0.10 (0.02, 0.18)                      | .02     | -0.06 (-0.15, 0.03)            | .18     | 0.17 (0.06, 0.29)                | .003    | 0.15 (-0.14, 0.43)       | .31     |
| Friday                                   | 0.28 (0.20, 0.36)                      | <.001   | -0.03 (-0.12, 0.05)            | .47     | 0.48 (0.36, 0.60)                | <.001   | 0.59 (0.30, 0.88)        | <.001   |
| Saturday                                 | -0.07 (-0.20, 0.07)                    | .33     | -0.11 (-0.24, 0.01)            | .08     | 0.04 (-0.15, 0.24)               | .66     | -0.44 (-0.87, -0.01)     | .04     |
| <b>Year of surgery</b>                   | 0.02 (0.01, 0.03)                      | <.001   | 0.01 (0.00, 0.02)              | .03     | 0.03 (0.02, 0.05)                | <.001   | 0.02 (-0.01, 0.06)       | .22     |
| <b>Sex (base=Male)</b>                   |                                        |         |                                |         |                                  |         |                          |         |
| Female                                   | 0.04 (-0.01, 0.09)                     | .09     | 0.03 (-0.02, 0.09)             | .20     | 0.01 (-0.07, 0.08)               | .89     | 0.06 (-0.11, 0.23)       | .51     |
| <b>Age at surgery (years)</b>            | -0.01 (-0.01, 0.00)                    | <.001   | 0.00 (-0.01, 0.00)             | .003    | 0.00 (0.00, 0.00)                | .48     | -0.01 (-0.02, -0.01)     | <.001   |
| <b>Ocular comorbidities</b>              |                                        |         |                                |         |                                  |         |                          |         |
| Myopia                                   | 0.20 (0.01, 0.38)                      | .03     | 0.25 (0.05, 0.44)              | .01     | 0.09 (-0.19, 0.36)               | .54     | 0.28 (-0.26, 0.82)       | .31     |
| Pseudophakia                             | 0.62 (0.36, 0.89)                      | <.001   | 0.15 (-0.15, 0.46)             | .33     | 0.70 (0.38, 1.01)                | <.001   | -0.69 (-3.62, 2.25)      | .65     |
| Lattice degeneration                     | 0.03 (-0.05, 0.11)                     | .43     | -0.02 (-0.12, 0.07)            | .67     | -0.12 (-0.24, -0.01)             | .03     | 0.16 (-0.08, 0.40)       | .19     |
| Vitreous hemorrhage                      | -0.27 (-0.36, -0.19)                   | <.001   | -0.10 (-0.22, 0.02)            | .11     | -0.27 (-0.39, -0.15)             | <.001   | -0.27 (-0.87, 0.33)      | .37     |
| <b>Insurance plan (base=PPO)</b>         |                                        |         |                                |         |                                  |         |                          |         |
| EPO                                      | -0.32 (-0.53, -0.12)                   | .002    | 0.17 (-0.03, 0.37)             | .45     | -0.15 (-0.44, 0.13)              | .29     | 0.57 (-0.09, 1.22)       | .09     |
| HMO                                      | -0.32 (-0.43, -0.20)                   | <.001   | -0.02 (-0.11, 0.06)            | .10     | -0.03 (-0.15, 0.09)              | .63     | 0.10 (-0.17, 0.37)       | .47     |
| POS                                      | -0.31 (-0.43, -0.19)                   | <.001   | -0.03 (-0.14, 0.07)            | .60     | -0.05 (-0.19, 0.09)              | .45     | 0.27 (-0.08, 0.62)       | .13     |
| Comprehensive                            | -0.32 (-0.40, -0.23)                   | <.001   | 0.04 (-0.06, 0.13)             | .54     | 0.31 (0.19, 0.43)                | <.001   | 0.52 (0.16, 0.88)        | .004    |
| POS with capitation                      | -0.30 (-0.62, 0.02)                    | .07     | 0.30 (0.00, 0.60)              | .05     | -0.05 (-0.52, 0.42)              | .84     | 0.14 (-0.90, 1.18)       | .79     |
| CDHP                                     | -0.42 (-0.55, -0.29)                   | <.001   | -0.03 (-0.14, 0.08)            | .63     | -0.15 (-0.30, 0.01)              | .07     | -0.20 (-0.56, 0.15)      | .26     |
| HDHP                                     | -0.42 (-0.57, -0.27)                   | <.001   | -0.08 (-0.21, 0.05)            | .22     | -0.09 (-0.28, 0.09)              | .33     | 0.03 (-0.40, 0.47)       | .88     |

| <b>Place of surgery</b>    |                   |       |                     |       |                     |       |                    |     |
|----------------------------|-------------------|-------|---------------------|-------|---------------------|-------|--------------------|-----|
| Inpatient hospital         | 0.89 (0.51, 1.28) | <.001 | -0.22 (-0.82, 0.39) | .48   | -0.15 (-0.65, 0.35) | .55   | 1.00 (-0.06, 2.06) | .06 |
| Outpatient hospital        | 1.15 (1.10, 1.20) | <.001 | 0.22 (0.12, 0.32)   | <.001 | 0.20 (0.06, 0.34)   | .005  | 0.17 (-0.14, 0.48) | .28 |
| Emergency room             | 0.90 (0.48, 1.31) | <.001 | -0.26 (-0.94, 0.43) | .46   | 0.19 (-0.39, 0.78)  | .52   | 0.06 (-0.96, 1.08) | .91 |
| Ambulatory surgical center | 1.33 (1.26, 1.41) | <.001 | 0.11 (-0.07, 0.28)  | .24   | 0.44 (0.29, 0.60)   | <.001 | 0.32 (-0.06, 0.70) | .10 |
| Other                      | 1.62 (1.23, 2.01) | <.001 | 0.62 (0.13, 1.10)   | .01   | 0.80 (0.29, 1.30)   | .002  | 1.10 (-0.84, 3.03) | .27 |
